# Supplementary material for: Radiation polymerization for the preparation of universal coatings: remarkable anti-fogging and frost-resisting performance
Source: Royal Society of Chemistry journal article supplement (doi:10.1039/d3ra08542b), 2024-01-01
Supplement: d3ra08542b3.pdf [file d3ra08542b3.pdf]

## Radiation polymerization for the preparation of universal coatings: remarkable anti-fogging and frost-resisting performance

### Supporting information

Table S1. Elemental content obtained from EDS

| elements     | wt%    | wt% Sigma |
|--------------|--------|-----------|
| C            | 54.41  | 0.15      |
| O            | 33.89  | 0.14      |
| Na           | 4.88   | 0.04      |
| S            | 6.82   | 0.04      |
| Total amount | 100.00 |           |

Assuming the quality of the coated area scanned in EDS is 100M, according to EDS results, the mass of S is 6.82M, with a molar amount of 0.213Mmol; the mass of Na is 4.88M, with a molar amount of 0.212Mmol; the mass of O is 33.89M, with a molar amount of 1.059Mmol. The O in the coating comes from -COOH and -SO<sub>3</sub>Na, as can be deduced from the molar amount of Na that the molar amount of SO<sub>3</sub><sup>-</sup> is 0.212Mmol. Therefore, all remaining O comes from -COOH, yielding a molar amount of 0.212Mmol. Consequently, the molar ratio of AA and SAS in the EDS-scanned area is 1:1, while the weight ratio of AA and SAS in the feed is 2:1. As the molar mass of SAS is twice that of AA, their molar ratio is also 1:1, consistent with the result inferred through EDS scanning.

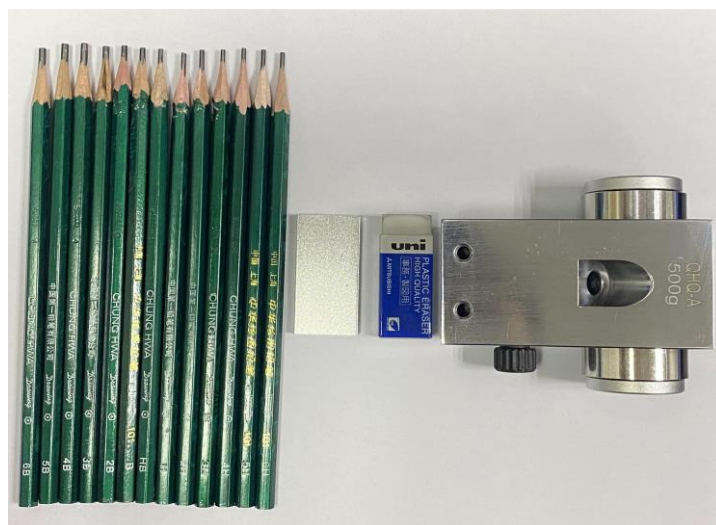

Figure S1. Pencil hardness tester for scratch hardness testing.

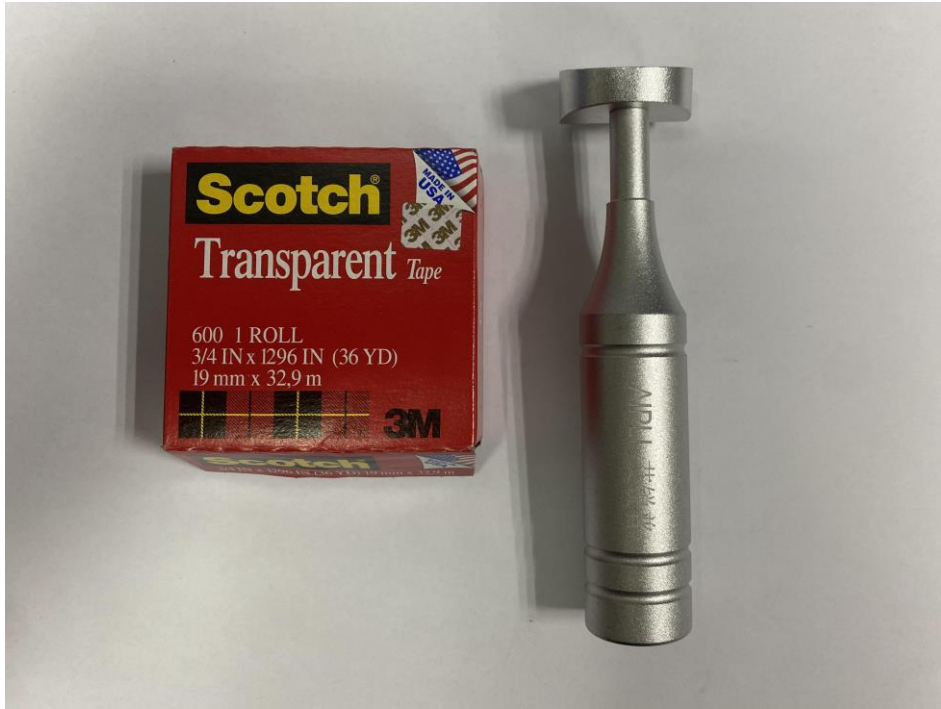

**Figure S2.** Peg knives for adhesion testing of adhesive tapes.

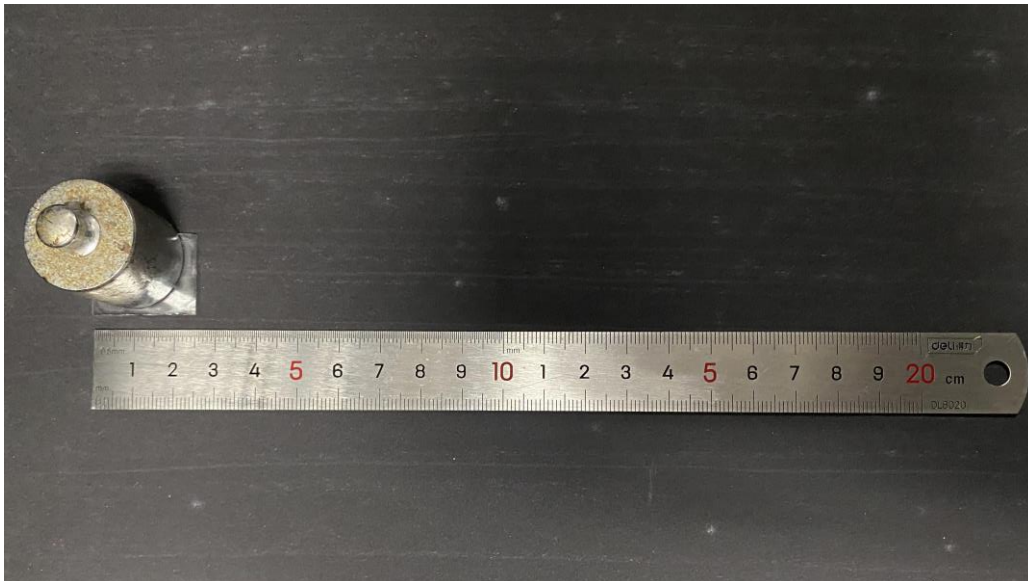

**Figure S3.** Scratch resistance test of coatings.

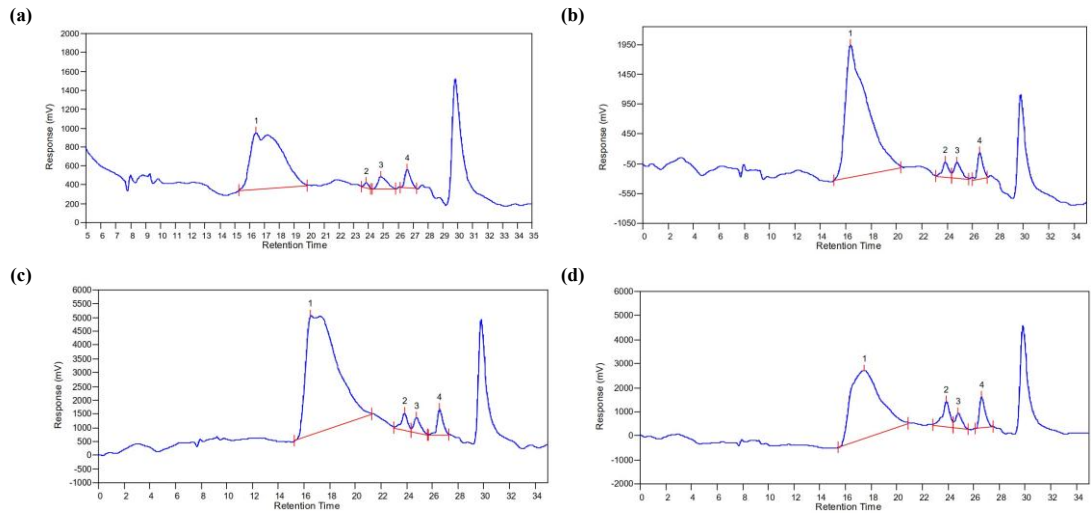

**Figure S4.** GPC curve of the  $AA_m/SAS_n$ : (a)  $AA_{10}/SAS_3$ ; (b)  $AA_{10}/SAS_5$ ; (c)  $AA_{10}/SAS_7$ ; (d)  $AA_{10}/SAS_{10}$ .

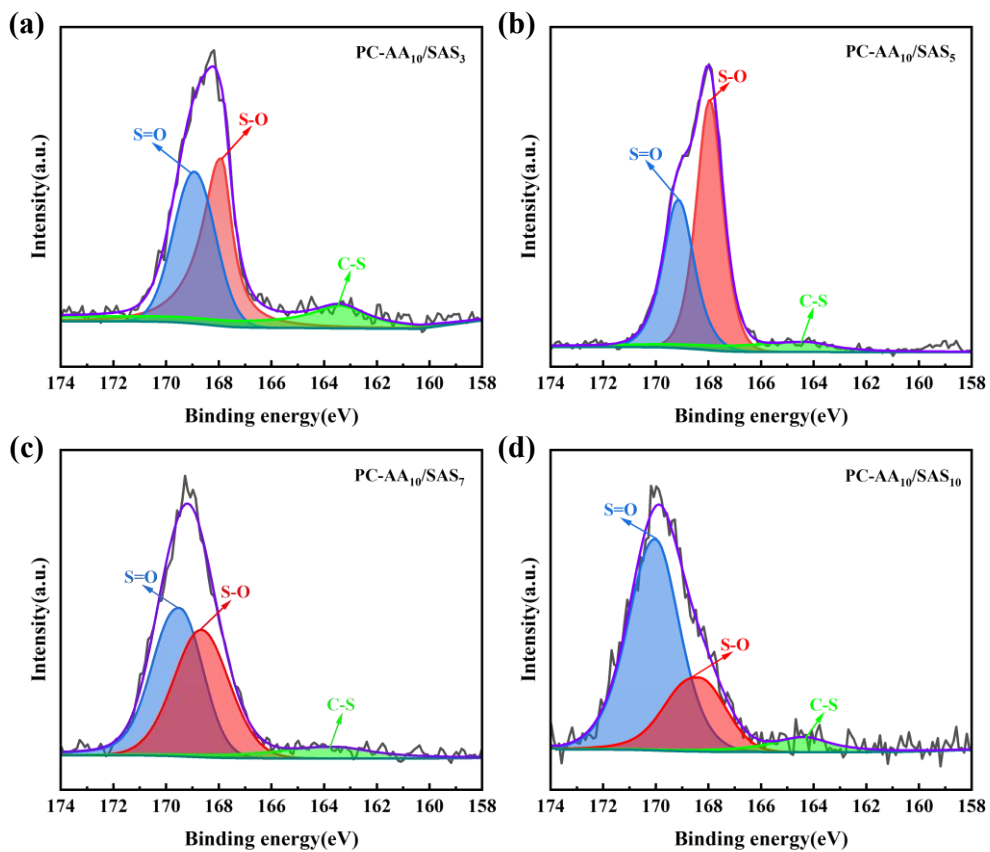

**Figure S5.** high-resolution XPS spectra of S2p: (a) PC- $AA_{10}/SAS_3$ ; (b) PC- $AA_{10}/SAS_5$ ; (c) PC- $AA_{10}/SAS_7$ ; (d) PC- $AA_{10}/SAS_{10}$ .

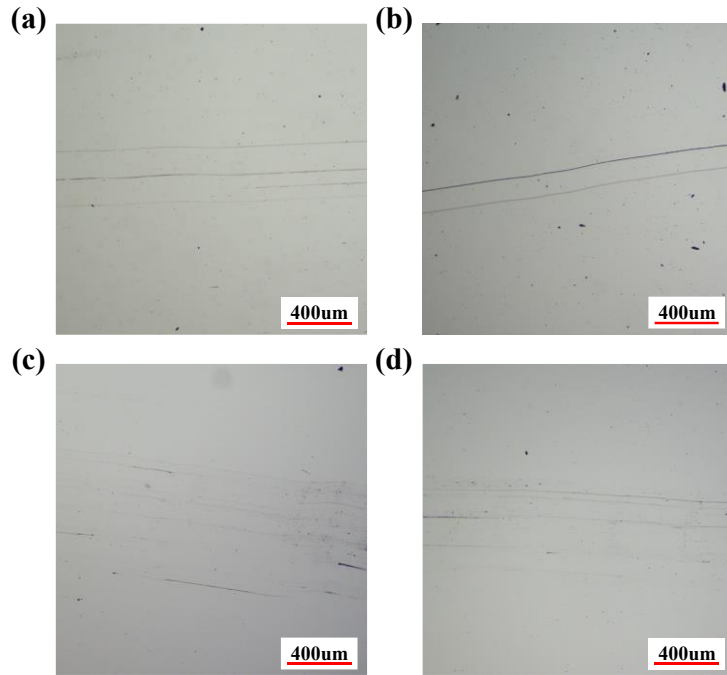

**Figure S6.** Optical photograph of pencil scratch hardness test: (a) PC-AA<sub>10</sub>/SAS<sub>3</sub> (2B) ; (b) PC-AA<sub>10</sub>/SAS<sub>5</sub> (HB) ; (c) PC-AA<sub>10</sub>/SAS<sub>7</sub> (H) ; (d) PC-AA<sub>10</sub>/SAS<sub>10</sub> (B).

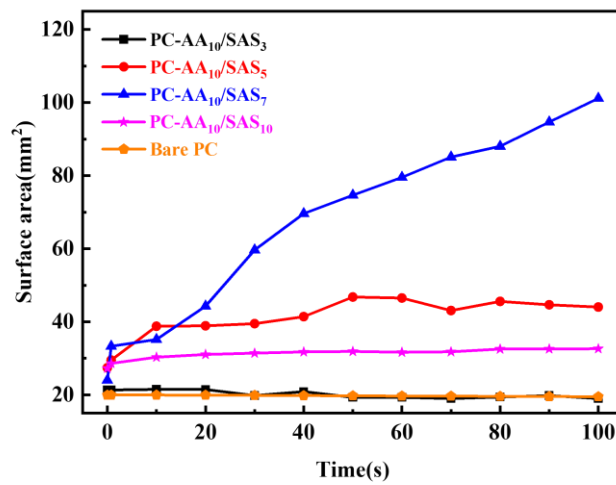

**Figure S7.** Change in surface area after spreading water droplets in 100s.

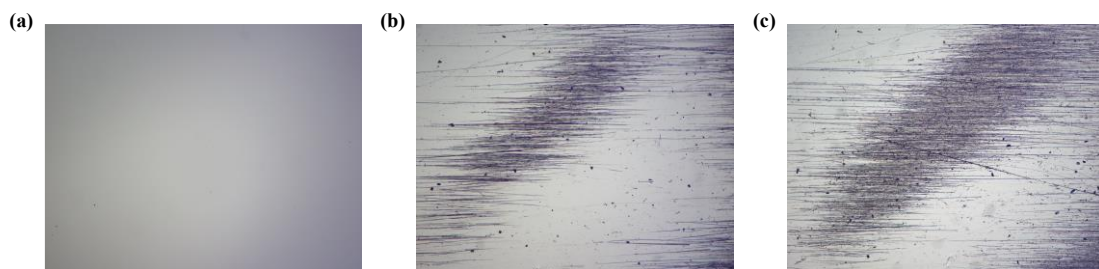

**Figure S8.** Optical microscope image after scratch test: (a) Initial state; (2) After ten

tests; (3) After fifteen tests.

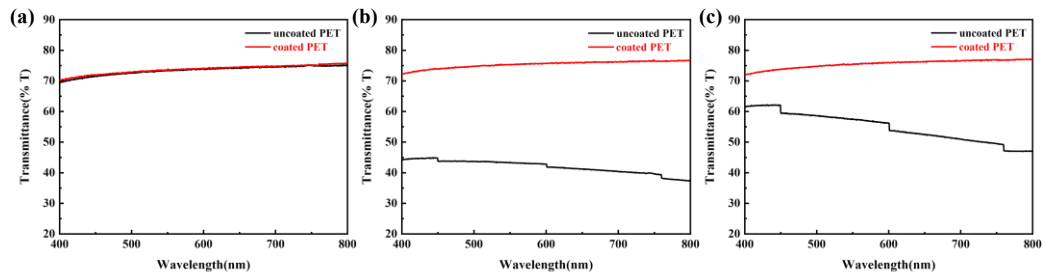

**Figure S9.** Transmittance of uncoated and coated PET with different test conditions: (a) at ambient condition (25°C, RH50%); (b) after conditioned at 80°C for 15s; (c) after conditioned at -25°C for 30 min.

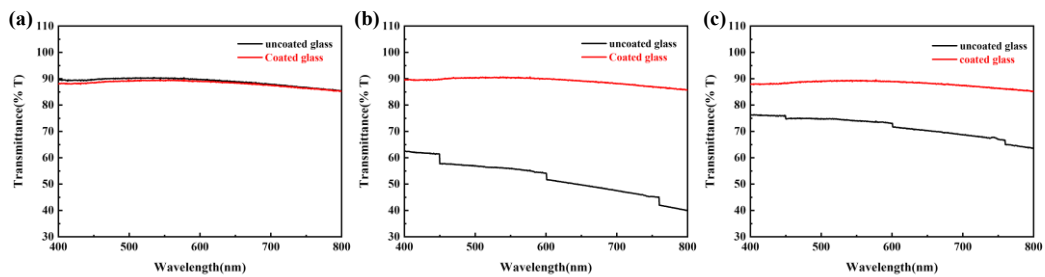

**Figure S10.** Transmittance of uncoated and coated glass with different test conditions: (a) at ambient condition (25°C, RH50%); (b) after conditioned at 80°C for 15s; (c) after conditioned at -25°C for 30min.

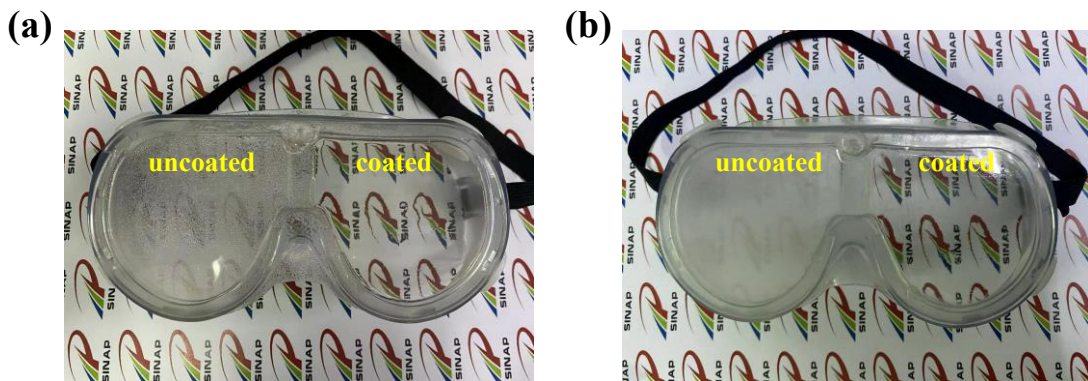

**Figure S11.** Anti-fogging and frost-resisting test images after one year: (a) Anti-fogging test; (b) Frost-resisting test.
